# Supplementary material
Source: HighWire-hosted journal article supplement (https://cmaj.ca/highwire/filestream/78447/field_highwire_adjunct_files/0/202026-case-1-at.pdf)
Supplement: 202026-case-1-at.pdf [file 202026-case-1-at.pdf]

## Appendix 1

| Common agents that may cause drug-induced liver injury                                                                                                                                                          |                                                                             |
|-----------------------------------------------------------------------------------------------------------------------------------------------------------------------------------------------------------------|-----------------------------------------------------------------------------|
| Agent                                                                                                                                                                                                           | Mechanism of hepatotoxicity                                                 |
| Antibiotics <ul style="list-style-type: none"> <li>• Amoxicillin-clavulanate</li> <li>• Cephalosporins</li> <li>• Fluoroquinolones</li> <li>• Nitrofurantoin</li> <li>• Macrolides</li> </ul>                   | Idiosyncratic                                                               |
| Statins <ul style="list-style-type: none"> <li>• Atorvastatin</li> <li>• Simvastatin</li> </ul>                                                                                                                 | Direct or idiosyncratic                                                     |
| Anti-epileptics <ul style="list-style-type: none"> <li>• Phenytoin</li> <li>• Carbamazepine</li> </ul>                                                                                                          | Idiosyncratic                                                               |
| Antineoplastic agents <ul style="list-style-type: none"> <li>• Doxorubicin</li> <li>• Cyclophosphamide</li> <li>• Methotrexate</li> <li>• Asparaginase</li> </ul>                                               | Direct or idiosyncratic                                                     |
| Acetaminophen                                                                                                                                                                                                   | Direct                                                                      |
| Herbal medications or supplements <ul style="list-style-type: none"> <li>• <i>Camellia sinensis</i> (green tea extracts)</li> <li>• Ephedra (ma-huang)</li> <li>• Multicomponent dietary supplements</li> </ul> | Direct or idiosyncratic<br>Idiosyncratic<br>Unknown; commonly idiosyncratic |
